# Supplementary material
Source: publisher site journal article supplement (https://www.dovepress.com/article/262991)
Supplement: Supplementary file 1 [file get_supplementary_file.php]

**Supplemental Table 1:** **Clinical laboratory indicators beyond the reference interval**

| **Patient**  **No.** | **Blood routine** | **Routine urinalysis** | **Fecal occult blood testing** | **Serum levels of common vitamins** | **Coagulation** | **Blood biochemical test** |
| --- | --- | --- | --- | --- | --- | --- |
| 1 | N | N | N | N/A | N | LPa: 558mg/L |
| 2 | WBC: 3.4×109/L | CRY: 21(+)p/μl | N | N | PT%: 178.10% | CREA: 37.6μmol/L,  TC: 6.16mmol/L,  TG: 4.38mmol/L,  ApoB: 1.29g/L |
| 3 | PLT: 111L,  PCT: 0.12% | N | N | N | N | LPa: 819.5mg/L |
| 4 | N | N | N | N | N | ALT: 119.9U/L,  AST: 76.7U/L |
| 5 | N | N | N | VE: 4.2μg/mL | N | ApoB: 1.2g/L,  TG: 2.82mmol/L,  LPa: 538mg/L |
| 6 | Baso: 0.1/L | RBC: 13.96（+）p/μl | N | VD:17.6nmol/L  VE: 4.5μg/mL  VB6: 43.8nmol/L  VB12:148.3pg/mL | N | GGT: 112.3U/L,  TC: 6.76mmol/L,  LDL-C: 4.44mmol/L  ApoB: 1.53g/L,  TG: 3.01mmol/L, |
| 7 | MPV: 9.3fL | EPI: 42.24（++）p/μl | N | VB12:146.5pg/mL  VE: 4.1 μg/mL | N | LPa: 396.5mg/L |
| 8 | N | N | N | VB6: 34nmol/L | N | CK: 35.2U/L  AST: 12.5U/L  TP: 58.4g/L  ALB: 38.7g/L |
| 9 | N | N | N | N | D-D: 3.31mg/l FEU  FDP: 9.25μg/ml | TG: 3.65mmol/L |
| 10 | N | N | N | N | N | K: 3.43mol/L  ALP: 24.3U/L |
| 11 | Baso%: 2% | EPI: 64.68（++）p/μl  MUC: 848.10（++）p/μl | N | VB6: 35.5nmol/L | N | ApoB: 1.22 g/L |
| 12 | LYMPH: 3.5/L  LYMPH%: 58.5%  NEUT%: 33.4% | RBC: 13.2（+）p/μl  WBC: 292.05（++）p/μl | N | N | N | N |
| 13 | Baso%: 1.1% | N | N | N | N | UREA: 2.27mmol/L |
| 14 | N | EPI: 9.24（+）p/μl | N | N | N | ALP: 43.7U/L |
| 15 | N | MUC: 814.44（++）p/μl | N | N | N | P: 0.77mmol/L  LDL-C: 1.57mmol/L  ApoB: 0.53g/L |
| 16 | N | MUC: 665.94（++）p/μl | N | VE: 3.6μg/mL | N | LDL-C: 1.84mmol/L |
| 17 | N | N | N | N | N | N |
| 18 | N | N | N | VB1 37.1nm  VB6:22.9nmol/L | N | N |
| 19 | N | N | N | VB1:27.7nmol/L  VB2: 2.0μg/L | N | TC: 2.83mmol/L  LDL-C: 1.44mmol/L  ApoB: 0.56g/L |
| 20 | N | N | N | N | N | N |

*Abbreviations: ALB, Albumin; ALT, Alanine aminotransferase; ApoB, Apolipoprotein B; AST, Aspartate aminotransferase; Baso, Basophils; CK, Creatine kinase; CRY, Crystal;* *CREA, Creatinine; D-D, D-Dimer;* *EPI, epithelial cell; FDP, Fibrinogen degradation product; GGT, Gama glutamyltransferase; K, kalium; LDL-C, Low-density lipoprotein cholesterol; LPa, Lipoprotein(a); LYMPH, lymphocyte; MPV, Mean platelet volume; MUC, Mucous strands; N, normal; N/A, not available. NEUT, Neutrophil; P, Phosphorus;* *PCT, Plateletocrit; PLT, blood platelet; PT, Prothrombin time; RBC, Red blood cell; TC, Serum total cholesterol; TG, Triglyceride; WBC, White blood cell.*

**Supplemental Table 2: Past-history** **and medications**

| **Patient**  **No.** | **Previous psychiatric diagnoses** | **Previously treated for anxiety or depression** | **Past-history** | **Other medications taken during PCSL** |
| --- | --- | --- | --- | --- |
| 1 | anxiety, depression | Mirtazapine | N | N |
| 2 | N | N | Osteoporosis, Hypertriglyceridemia, Anemia | N |
| 3 | anxiety | Lorazepam | Atrioventricular block, Premature atrial contraction | N/A |
| 4 | N | N | N | N |
| 5 | N | N | Hypertension, Hypothyroidism | Euthyrox, Norvasc |
| 6 | depression | Deanxit, Milnacipran, Lorazepam, Tandospirone | Nodal tachycardia | Metoprolol |
| 7 | N | N | Osteonecrosis of femoral head | N |
| 8 | N | N | Diabetes, Knee osteoarthritis | N/A |
| 9 | anxiety, depression | Lorazepam, Mirtazapine | Arrhythmia, Hypertension, Hypertriglyceridemia | N/A |
| 10 | anxiety | Mirtazapine | Hypokalemia, Hypocalcemia | Mirtazapine |
| 11 | N | N | Fibromyalgia | N |
| 12 | N | N | Ventricular premature beat, Irritable bowel syndrome | N/A |
| 13 | depression | Mirtazapine | Ventricular premature beat, Hypertension | N/A |
| 14 | depression | Olanzapine, Paroxetine | N | N |
| 15 | N | N | Sinus arrhythmia, Benign prostatic hyperplasia | Clonazepam |
| 16 | anxiety, depression | Olanzapine, Escitalopram oxalate | Sinus arrhythmia, Slipped disk, Jugular vein thrombosis | N |
| 17 | depression | Mirtazapine | Diabetes, Hypertriglyceridemia | Clonazepam, Zolpidem, Oxazepam, Metformin |
| 18 | N | N | N | N |
| 19 | N | N | N | N |
| 20 | Depression | Mirtazapine, Trazodone | N | N |
